# Supplementary material for: Involvement of the Tetraspanin 2 (TSPAN2) Gene in Migraine: A Case-Control Study in Han Chinese
Source: PubMed Central journal article supplement (PMC6143784; doi:10.3389/fneur.2018.00714), 2018-09-11
Supplement: Table_1.pdf [file Table_1.pdf]

**Table S1. Genotype-phenotype association of the two SNPs and migraine features in migraine patients**

| <b>Migraine</b>                      | <b>rs12134493</b>   |                | <b>rs2078371</b>    |                |
|--------------------------------------|---------------------|----------------|---------------------|----------------|
|                                      | <b>OR (95% CI)</b>  | <b>P-value</b> | <b>OR (95% CI)</b>  | <b>P-value</b> |
| Unilateral migraine                  | 1.358 (0.817-2.259) | 0.238          | 1.518 (0.827-2.785) | 0.178          |
| Pulsating headache                   | 0.693 (0.332-1.447) | 0.329          | 0.689 (0.283-1.676) | 0.412          |
| Severe headache                      | 0.749 (0.351-1.599) | 0.456          | 0.873 (0.371-2.055) | 0.757          |
| Aggravation by physical activity     | 0.908 (0.507-1.627) | 0.746          | 0.970 (0.481-1.959) | 0.933          |
| Nausea/vomiting                      | 1.079 (0.524-2.220) | 0.837          | 0.598 (0.207-1.724) | 0.341          |
| Phonophobia                          | 0.664 (0.280-1.575) | 0.353          | 1.022 (0.346-3.014) | 0.969          |
| Photophobia                          | 1.827 (0.758-4.401) | 0.179          | 1.477 (0.500-4.361) | 0.48           |
| Family history                       | 1.575 (0.843-2.941) | 0.154          | 1.540 (0.726-3.269) | 0.261          |
| Average age of onset $\leq$ 27 years | 0.791 (0.433-1.445) | 0.446          | 1.036 (0.512-2.098) | 0.921          |
| Menstruation-associated <sup>a</sup> | 0.624 (0.346-1.125) | 0.117          | 0.862 (0.423-1.756) | 0.682          |

CI: confidence interval, OR: odds ratio.

Age and sex-adjusted logistic regression models comparing the minor allele.

a: All female migraine patients
